# Supplementary material for: Subsurface swimming and stationary diving are metabolically cheap in adult Pacific walruses (Odobenus rosmarus divergens)
Source: Oxford University Press journal article supplement (doi:10.1242/jeb.242993), 2021-11-08
Supplement: jeb242993supp.pdf [file jeb242993supp.pdf]

## Supplementary materials and methods

### Description for cADL calculation

The cADL was estimated by applying the methodology described in Kooyman (1989) and using specific estimates of tissues and oxygen-binding proteins proportions for walruses when available. The following assumptions were used to estimate the tissues (blood, muscle, and lungs) O<sub>2</sub> storage capacity and utilization during the dive. The total blood volume (BV, l) was calculated using the mass-specific estimation of 0.106 l blood kg<sup>-1</sup> (Lenfant et al., 1970). The estimated proportions of arterial and venous blood were considered as 33% and 67% respectively (Lenfant et al., 1970). The initial and final arterial haemoglobin (Hb) saturation were assumed to be 95% and 20%, respectively. The initial venous O<sub>2</sub> content was assumed to be 5 vol% less than the initial arterial O<sub>2</sub> content, with a final venous O<sub>2</sub> content of zero (Ponganis, 2011). The Hb content of adult female walruses has been reported to be 16.8 g Hb 100 ml<sup>-1</sup> of blood (Wołk and Kosygin, 1979), and the oxygen-binding capacity is 1.34 ml O<sub>2</sub> g<sup>-1</sup> Hb (Kooyman, 1989). The final equations utilized for the calculation of total volume of blood O<sub>2</sub> (l) were:

$$1) \text{ Arterial O}_2 = (\text{BV} \times M_b \times 0.33) \times (0.95 - 0.20 \text{ saturation}) \times ([\text{Hb}] \times 0.00134)$$

$$2) \text{ Venous O}_2 = (\text{BV} \times M_b \times 0.67) \times (\text{initial arterial O}_2 \text{ content} - 5\text{vol}\%)$$

The total muscle O<sub>2</sub> storage capacity was estimated by calculating the total muscular myoglobin (Mg) content. The total muscle mass (kg) was calculated as 0.2410 M<sub>b</sub><sup>1.084</sup>, an equation derived from excised tissues of Atlantic walruses (Knutsen and Born, 1994). The specific Mg content for the longissimus dorsi muscle in adult walruses has been estimated to be 3.8 g Mg 100 g<sup>-1</sup> of wet muscle mass (Noren et al., 2015) and was assumed equal for all muscle groups. However, this approach can potentially overestimate the overall muscle O<sub>2</sub> storage capacity as lower levels of Mg have been reported for non-swimming muscles in pinnipeds (Kanatous et al., 1999). The Mg has been reported to possess the same oxygen-binding capacity than that reported for Hg (Kooyman, 1989). Thus, the equation used for the calculation of total volume of muscle O<sub>2</sub> (l) was:

$$3) \text{ Muscle O}_2 = \text{Total muscle mass} \times ([\text{Mg}] \times 0.00134)$$

The total lung O<sub>2</sub> storage capacity was computed by calculating the estimated total lung capacity (TLC<sub>est</sub>, l) using previous equation for marine mammals (TLC<sub>est</sub> = 0.135 M<sub>b</sub><sup>0.92</sup>, Fahlman et al., 2011; Kooyman, 1973). The diving lung volume was assumed to be 50% of TLC<sub>est</sub> for pinnipeds with a 15% of available O<sub>2</sub> concentration in the lungs to be extracted during the dive (Ponganis, 2011). The final equation to yield the calculation of total volume of lung O<sub>2</sub> (l) was:

$$4) \text{ Lung O}_2 = M_b \times \text{TLC}_{\text{est}} \times 0.5 \times 0.15$$

All calculations were made using the overall average M<sub>b</sub> for the three participating female walrus during the experiments (835 kg). The total body O<sub>2</sub> storage capacity (37.62 l O<sub>2</sub>) was computed by summing the estimated O<sub>2</sub> storage capacity for each tissue. The cADL was computed by dividing the resulted total body O<sub>2</sub> storage capacity by the measured average DMR<sub>swim</sub> (4.91 l O<sub>2</sub> min<sup>-1</sup>).

## Supplementary tables

**Table S1. Body mass and respiratory variables for each metabolic experiment**

| Experiment                    | M <sub>b</sub><br>(kg)  | f <sub>R</sub><br>(breaths min <sup>-1</sup> ) | $\dot{V}CO_2$<br>(l CO <sub>2</sub> min <sup>-1</sup> ) | RER                        |
|-------------------------------|-------------------------|------------------------------------------------|---------------------------------------------------------|----------------------------|
| Floating at the water surface | 844 ± 124<br>(697-1030) | 5.8 ± 2.3<br>(3.1-9.6)                         | 4.47 ± 0.94<br>(2.93-5.92)                              | 0.97 ± 0.05<br>(0.90-1.04) |
| Stationary dive               | 827 ± 108<br>(697-967)  | 6.0 ± 1.9<br>(3.7-9.9)                         | 3.58 ± 0.62<br>(2.84-4.47)                              | 0.94 ± 0.07<br>(0.81-1.06) |
| Subsurface swimming           | 834 ± 113<br>(688-972)  | 6.6 ± 1.9<br>(3.6-9.7)                         | 4.58 ± 0.58<br>(3.67-5.49)                              | 0.94 ± 0.06<br>(0.85-1.05) |

For the three adult female Pacific walrus participating in metabolic measurements while floating at the water surface, and after performing stationary dives and horizontal subsurface swimming (n = 15 for each respirometry experiment), average (± s.d.) and ranges of: body mass (M<sub>b</sub>), respiratory frequency (f<sub>R</sub>), CO<sub>2</sub> production rate ( $\dot{V}CO_2$ ) and respiratory exchange ratio (RER).

**Table S2. Summary of metabolic measurements converted to daily energetic requirements using obtained RER.**

| ANIMAL ID  | MR <sub>Surface</sub><br>(MJ day <sup>-1</sup> ) | sMR <sub>Surface</sub><br>(kJ kg <sup>-1</sup> day <sup>-1</sup> ) | DMR <sub>Stationary</sub><br>(MJ day <sup>-1</sup> ) | sDMR <sub>Stationary</sub><br>(kJ kg <sup>-1</sup> day <sup>-1</sup> ) | DMR <sub>Swim</sub><br>(MJ day <sup>-1</sup> ) | sDMR <sub>Swim</sub><br>(kJ kg <sup>-1</sup> day <sup>-1</sup> ) |
|------------|--------------------------------------------------|--------------------------------------------------------------------|------------------------------------------------------|------------------------------------------------------------------------|------------------------------------------------|------------------------------------------------------------------|
| 26005388   | 109.3 ± 13.4                                     | 154.0 ± 17.9                                                       | 105.6 ± 9.4                                          | 149.9 ± 12.2                                                           | 117.9 ± 8.0                                    | 167.9 ± 9.4                                                      |
| 26005389   | 165.5 ± 20.2                                     | 166.6 ± 24.8                                                       | 132.5 ± 6.9                                          | 138.1 ± 6.7                                                            | 165.5 ± 5.9                                    | 171.0 ± 5.8                                                      |
| 26005390   | 141.5 ± 26.4                                     | 171.3 ± 30.7                                                       | 102.2 ± 13.4                                         | 124.8 ± 16.3                                                           | 154.0 ± 3.7                                    | 185.2 ± 4.6                                                      |
| Grand Mean | 138.8 ± 30.6<br>(95.0-193.7)                     | 164.0 ± 24.4<br>(126.3-203.9)                                      | 113.4 ± 16.9<br>(87.0-139.8)                         | 137.6 ± 15.6<br>(105.9-163.0)                                          | 145.8 ± 21.7<br>(106.5-172.7)                  | 174.7 ± 10.1<br>(154.8-190.1)                                    |

For each participating female Pacific walrus (Animal ID) and behaviour, average ( $\pm$  s.d) of measured metabolic rate (floating at the water surface: MR<sub>Surface</sub>; stationary dives: DMR<sub>Stationary</sub>; subsurface swimming: DMR<sub>Swim</sub>) and mass-specific metabolic rate (floating at the water surface: sMR<sub>Surface</sub>; stationary dives: sDMR<sub>Stationary</sub>; subsurface swimming: sDMR<sub>Swim</sub>). N = 5 for all experiments with each individual. Overall average ( $\pm$  s.d) and ranges are also reported for each behaviour.

## References

- Fahlman, A., Loring, S. H., Ferrigno, M., Moore, C., Early, G., Niemeyer, M., Lentell, B., Wenzel, F., Joy, R. and Moore, M. J.** (2011). Static inflation and deflation pressure-volume curves from excised lungs of marine mammals. *J. Exp. Biol.* **214**, 3822-3828.
- Kanatous, S. B., DiMichele, L. V., Cowan, D. F. and Davis, R. W.** (1999). High aerobic capacities in the skeletal muscles of pinnipeds: adaptations to diving hypoxia. *J. Appl. Physiol.* **86**, 1247-1256.
- Knutsen, L. Ø. and Born, E. W.** (1994). Body growth in Atlantic walruses (*Odobenus rosmarus rosmarus*) from Greenland. *J. Zool.* **234**, 371-385.
- Kooyman, G. L.** (1973). Respiratory adaptations in marine mammals. *Am. Zool.* **13**, 457-468.
- Kooyman, G. L.** (1989). *Diverse Divers: Physiology and Behavior*. Berlin: Springer-Verlag.
- Lenfant, C., Johansen, K. and Torrance, J. D.** (1970). Gas transport and oxygen storage capacity in some pinnipeds and the sea otter. *Respir. Physiol.* **9**, 277-286.
- Noren, S. R., Jay, C. V., Burns, J. M. and Fischbach, A. S.** (2015). Rapid maturation of the muscle biochemistry that supports diving in Pacific walruses (*Odobenus rosmarus divergens*). *J. Exp. Biol.* **218**, 3319-3329.
- Ponganis, P. J.** (2011). Diving mammals. *Compr. Physiol.* **1**, 517-535.
- Wolk, E. and Kosygin, G. M.** (1979). A hematological study of the walrus, *Odobenus rosmarus*. *Acta Theriol. Sin.* **24**, 99-107.
